# Supplementary material for: The chromatin remodeler DDM1 promotes hybrid vigor by regulating salicylic acid metabolism
Source: PubMed Central journal article supplement (PMC4977722; doi:10.1038/celldisc.2016.27), 2016-08-09
Supplement: celldisc201627-s1.pdf [file celldisc201627-s1.pdf]

**Supplemental Table S1. Genetic information for mutant alleles of the RdDM pathway in Col and C24 background, Related to Figure 1.**

| <b>Gene Name</b> | <b>Gene ID</b> | <b>Col Alleles</b> | <b>C24 Alleles</b>                   |
|------------------|----------------|--------------------|--------------------------------------|
| RDR2             | AT4G11130      | SALK_059661        | CDS G405A/W135*                      |
| DMS3             | AT3G49250      | SALK_068723C       | T-DNA insertion at 21bp(from ATG)    |
| DRD1             | AT2G16390      | CDS_G2268A/W756*   | CDS_2286 35bp deletion               |
| RDM1             | AT3G22680      | CDS_C307T/R103*    | CDS_T456A/Y152*                      |
| NRPD1            | AT1G63020      | SALK_128428        | T-DNA insertion in the 8th exon      |
| NRPE1            | AT2G40030      | SALK_029919C       | gDNA_5189(from ATG), 31bp deletion   |
| AGO4             | AT2G27040      | SALK_071772        | gDNA_4641(from ATG), 6 bp deletion   |
| AGO6             | AT2G32940      | SALK_031553        | T-DNA insertion at 3104 bp(from ATG) |
| KTF1/RDM3        | AT5G04290      | SALK_001254        | T-DNA insertion in the 1st intron    |

**Supplemental Table S2. Primers for genotyping and Chop-PCR, Related to Figure 1 and 2.**

| Gene Name | Gene ID   | Alleles              | Forward (5' > 3')                  | Reverse (5' > 3')           | Enzymes  | Applied Alleles | Products |
|-----------|-----------|----------------------|------------------------------------|-----------------------------|----------|-----------------|----------|
| NRPD1     | AT1G63020 | Col                  | GATCTGTTTCAGCTTGCTCGTC             | TTAATGTTCTTCATGCGGGAC       | N/A      | N/A             | N/A      |
| NRPE1     | AT2G40030 | Col                  | ATTTCTTCTTTGATGGGGGAG              | TGTCGTGGATATGACCATTGG       | N/A      | N/A             | N/A      |
| DRD1      | AT2G16390 | Col                  | TCTGAGCAGCGTGAGTGGTCA              | GGGTCGAAACGCTCGCCCAA        | N/A      | N/A             | N/A      |
| RDM1      | AT3G22680 | Col                  | TCAGGAAAGATTGGGTCAATG              | GAAACCTCCGTTGGAAGATTC       | N/A      | N/A             | N/A      |
| KTF1/RDM3 | AT5G04290 | Col                  | GTGGGAAAGGAGAAGGATCAG              | AAACGCATGAAAACAACCTG        | N/A      | N/A             | N/A      |
| AGO4      | AT2G27040 | Col                  | TTCTCCAGCTGGCTAGCTATG              | CCCAGAAAGGTGACATCTTTG       | N/A      | N/A             | N/A      |
| RDR2      | AT4G11130 | Col                  | CTGATCGCGAGATTTAGTTC               | AGAAGATTGGAGCAAGCTTCC       | N/A      | N/A             | N/A      |
| AGO6      | AT2G32940 | Col                  | GTCTGGGAAACCCAAGAGAC               | ACCGAAGAAGTACCACCATC        | N/A      | N/A             | N/A      |
| DMS3      | AT3G49250 | Col                  | GAAACTCAGAATGGAGGAGGC              | TGATGATTCCTCCATCCAAAG       | N/A      | N/A             | N/A      |
| NRPD1     | AT1G63020 | C24                  | TGCTGTTTGCCGTTCCGTGGT              | AGCGCGCTGTAAGCTGCCTC        | N/A      | N/A             | N/A      |
| NRPE1     | AT2G40030 | C24                  | TCCTACAATGCCACCGATCCCGA            | ACTGCTCCCCATCAAAGAAGAAATCG  | Deletion | Mutant          | 110/75   |
| DRD1      | AT2G16390 | C24                  | TCTGAGCAGCGTGAGTGGTCA              | TGCGAGATGCTCCAACAAGCG       | Deletion | Mutant          | 115/80   |
| RDM1      | AT3G22680 | C24                  | CCCAGCAATCGTGGCTCGTT               | GCAGCCACAGCGAGAACTTGC       | MaeIII   | Mutant          | 350+276  |
| KTF1/RDM3 | AT5G04290 | C24                  | GCCCTTTTCTCCCTTGCCAGCC             | ACGGAGGCAGCTCCGACGAA        | N/A      | N/A             | N/A      |
| AGO4      | AT2G27040 | C24                  | GGTCTGAATATTGAACTTGATCAGATCATCGAGC | TGCAAGCCTGAGGAAAGAGAAATGC   | AluI     | Wild Type       | 80+ 35   |
| RDR2      | AT4G11130 | C24                  | ACGACATCGTTTTGACTGTTGGGT           | TGCATCAATCTCAGAAGCGTCACCA   | ApoI     | Mutant          | 140+125  |
| AGO6      | AT2G32940 | C24                  | TCCACACACAATGCATCTGCCCA            | GGGCCAGCATTTTGAACCAACAACC   | N/A      | N/A             | N/A      |
| DMS3      | AT3G49250 | C24                  | AGCGTGAGCAATGCCTCTCC               | AGAAAACCAAGTACGGCGTTCGACAA  | N/A      | N/A             | N/A      |
| DDM1      | AT5G66750 | <i>ddm1-1</i> (Col)  | TCGATGGCAGTGTGAAGCTGGA             | TCGTCTGCCGATTCTGTGGC        | NlaIII   | Wild Type       | 242+159  |
| DDM1      | AT5G66750 | <i>ddm1-9</i> (C24)  | TCGTGACAGATCTACCTCCTGT             | CTACGAGCCATGGGTTTGTGAAACAAA | ApoI     | Mutant          | 100+32   |
| DDM1      | AT5G66750 | <i>ddm1-10</i> (Col) | CCTAAACCGGGTTTGCTTTAC              | ATTGTTGCTCATGAGATTGG        | N/A      | N/A             | N/A      |
| DDM1      | AT5G66750 | <i>ddm1-14</i> (C24) | AGGGCCACAGTTGAAAAACCAC             | TGTCAAAAAGCTGCCACCAGTGT     | MboI     | Mutant          | 147+118  |

|          |           |                      |                              |                            |      |           |       |
|----------|-----------|----------------------|------------------------------|----------------------------|------|-----------|-------|
| DDM1     | AT5G66750 | <i>ddm1-15</i> (C24) | TGCCACAGAATCGGGCAGACG        | AGGCAACAATCTCAATGGTTTGAAGT | MnII | Wild Type | 63+63 |
| DDM1     | AT5G66750 | <i>ddm1-16</i> (Col) | GATGACCAGGTCCTTATCTTCTCCCATG | TCCAGCTTCACACTGCCATCG      | NcoI | Wild Type | 83+30 |
| Chop-PCR | 5S rDNA   | N/A                  | AATGGCAGCCCACGCAAGCA         | ATGCCACGGAGCCCCAACT        | N/A  | N/A       | N/A   |
| T-DNA    | LBb1.3    | N/A                  | ATTTTGCCGATTTTCGGAAC         | N/A                        | N/A  | N/A       | N/A   |
| T-DNA    | C24_LB    | N/A                  | TTGACCATCATACTCATTGCTG_      | N/A                        | N/A  | N/A       | N/A   |

---

**Supplemental Table S3. Primers for qPCR validation, Related to Figure 3.**

| Gene_ID   | Forward (5' > 3')         | Reverse (5' > 3')        |
|-----------|---------------------------|--------------------------|
| AT1G15890 | GTACGAAGCTGCCTTAAGCTACCG  | TTCATTGGCATGTCGCGGAAAC   |
| AT1G18860 | TGTGAGACACCAACGATGAACGAC  | AAGAAGCTGCAATGGTGCAACG   |
| AT1G58807 | CATGCCACTTCTTCGACTCTCG    | CCTAGAGTCGGCAATGGATCTTTC |
| AT1G61190 | ACGTATGGATCCTCCAGAACAGG   | TTTAGACGACGTAAGCGGTTTG   |
| AT1G61300 | ACTGGAGTCCTCCACTTTCCAC    | TCCCAGTCCTGGAGGATACATACG |
| AT1G61310 | GCAGAGGAAATGGAAGATCTGAG   | TTGATGGCGTGACTCCTCTCTC   |
| AT1G62630 | TTCCAGAAGTGGCAAGCAAGGC    | TCGTCTGCCATTTACACCTTTTC  |
| AT1G64280 | AACGATTCTCCCGCGCTGTTT     | TTCTCCGAAGCCAGTTGAGTC    |
| AT1G75040 | CCAAGTGGGACATGGTCAG       | ACTTGTGTGCTGGGAAGACA     |
| AT2G14610 | AGCTTCTTCTCAACCACACAGC    | TGGCAAGGTATCGCCTAGCATC   |
| AT2G21900 | AACGGGTAGTCCATTTCCAAGGC   | ACAGAAGGGCTTGGGTGGTTATG  |
| AT2G40750 | CACTGCTCAGAACCATGTCAATGC  | TGCTGTCACTGCTGGTGTG      |
| AT2G46400 | ACCTGCTGCTGTTGAGAATTCCG   | ACGACCACAACCAATCCTGTCC   |
| AT3G01345 | TTGCTGCCACACCAAGTATCG     | ACCAGCCCAAACAGAGGTAGAG   |
| AT3G04720 | ATCACCCACAGCACAGAGACAC    | AGCAATGCCGCTTGTGATGAAC   |
| AT3G14460 | ATCGAGACGATTCTGGTGGAG     | GGTGTAAAGCTTGCGCAAAGGC   |
| AT3G22600 | AGTCGCTGTAATACCGTGGTG     | CCTGGTCTGAAGAGTTTGGTG    |
| AT3G44400 | ATTCTTCGCCGGATCTCTCGTC    | TCGAATCCATCGAATGACTCAAGG |
| AT3G46730 | AGGCCATGGATTAGATGAGTTGCG  | TAATCGGCCCTTACAGTCAGC    |
| AT3G56400 | TGAGCTCGAACCAAGATGTTTCCAG | TGCTCTGGGAGTTTCTGCGTTG   |
| AT3G57260 | GCCATCTATTGTTGACTACCAATTT | ATCAATGGCCGAAACAAGCA     |
| AT4G09420 | AAGAAGCTCGAGCGTCTTCAG     | CGTAGTCTCGTGCATGGATTTCG  |



|           |                          |                          |
|-----------|--------------------------|--------------------------|
| AT4G12520 | TGCACCGCCCTAAAGGCTAAAG   | TCAAGCACATACGAAGCCGGAAG  |
| AT4G16860 | CCCTGCTGCATTGAGGATTTAACG | AAGTCGGCGACCATTAGACTTG   |
| AT4G16960 | AAGATGCGATGCGGCGTACAAC   | TCCAGATTTGAGCGGTCAATCC   |
| AT4G16990 | TGTGTGTTCCGCTAATGGTAAGGG | TGCAGGCATATGTGCTTGAGG    |
| AT4G19500 | TCAGGAAATGCCGAGTCTCCG    | CAGGGATTGAGAGGTGATTTCTGC |
| AT4G19510 | ACCACGGAAACTTGGATCTGACC  | TCTTCGCTCCATTTGAAGACTGG  |
| AT4G22470 | TGGTCGTAGGATTCCACAAGGC   | GTGGTGGTGGTGGAGATTGTTGG  |
| AT4G23810 | ATCCCGGCAGTGTCCAGAATC    | AGAACCTCCTCCATCGGCAAAC   |
| AT5G01080 | ATCCAACAGCCTCCTTTGGAG    | AGACGGCTCGAGCAAACAATG    |
| AT5G01900 | CAACCAGCTGCTCATCATGGAC   | ACTTGGCCAAATCCTCCCTTCC   |
| AT5G05400 | AGAAGGGTCAAGCAGCAACGAG   | AAGGATATGTCCCTCCGAACCC   |
| AT5G11250 | TCTATCCATGAGCCTGGACAACG  | ACTACCTGCTGCATCACCATT    |
| AT5G13080 | AGTGGACCAAGAAGTGGTCGTG   | TTCTCGATGGGATGCGAATGCAC  |
| AT5G24110 | TCTCGGAGCCAAATTTCCAAGAGG | TCCTCGGTAAGTATCTCAAGGAG  |
| AT5G24480 | CAAGCCATGTGGCAAAGGACAC   | AGGGAGCTTTGGTGTAGTCACG   |
| AT5G24770 | TTGGCAATATCGGAGATCAAT    | GGGACAATGCGATGAAGATAG    |
| AT5G26170 | AGAACAGCCACATCCAAGAAAC   | TCTTACGGGACAGCCATCAAC    |
| AT5G35760 | ACGCCATTATGATCCCATCTCCAC | GGTAATTGGCGGGTAAGGAGGTAG |
| AT5G35890 | TTGACAACCCGTGCTCTCACTG   | CCATGAAACTTGAGGGCCAATGC  |
| AT5G38350 | AGAACTTGTGGCAAGGAAATCAGC | AGTCCACCAAATTATGCATCC    |
| AT5G44420 | GTGCCAAAGTGAGGTGTAACAA   | CGTGTGTATGCATGATCACATC   |
| AT5G45490 | ATGGACAACCGACTCATCGAACC  | TCTTGAGCCAAGAGGCTGAGTC   |
| AT5G46350 | CACGACTCAGAAGTGCAACGTG   | AGGTTGTGATGACGACCGTTGG   |
| AT5G46900 | CCCAAGAGCCACCACAAGAAAC   | AGCGTCTTTACAAGTGGGTTTAGG |
| AT5G47260 | GTGGAGAAACTGCCACTGCAAAC  | TTGCGTGTGTTCCCGATTGGAC   |
| AT5G64810 | GACGGGTCATCGAGTTGCATTTAG | ACCGAGCAACCTTCACTTGAGC   |

---

**Supplemental Table S4. RNAseq data set, Related to Figure 3.**

| Sample Name        | Raw_Reads  | Clean_Reads | Data_size(bp) | Depth(X) | %      | Unique<br>Mapped_Reads | %      |
|--------------------|------------|-------------|---------------|----------|--------|------------------------|--------|
| Col_rep1*          | -          | 52,288,194  | 4,705,937,460 | 92.27    | -      | 48,227,445             | 92.23% |
| Col_rep2           | 44,724,802 | 42,287,710  | 4,271,058,710 | 83.75    | 94.55% | 40,320,043             | 95.35% |
| Col_rep3           | 42,998,300 | 42,117,826  | 4,253,900,426 | 83.41    | 97.95% | 40,286,420             | 95.65% |
| ColxC24_rep1*      | -          | 53,605,030  | 4,824,452,700 | 94.60    | -      | 47,787,869             | 89.15% |
| ColxC24_rep2       | 45,918,634 | 43,998,964  | 4,443,895,364 | 87.14    | 95.82% | 40,279,610             | 91.55% |
| ColxC24_rep3       | 43,703,976 | 42,865,730  | 4,329,438,730 | 84.89    | 98.08% | 39,847,384             | 92.96% |
| C24xCol_rep1*      | -          | 51,201,594  | 4,608,143,460 | 90.36    | -      | 44,183,216             | 86.29% |
| C24xCol_rep2       | 47,882,216 | 45,894,536  | 4,635,348,136 | 90.89    | 95.85% | 43,046,511             | 93.79% |
| C24xCol_rep3       | 48,116,248 | 47,346,672  | 4,782,013,872 | 93.76    | 98.40% | 43,910,050             | 92.74% |
| C24_rep1*          | -          | 51,313,670  | 4,618,230,300 | 90.55    | -      | 43,376,625             | 84.53% |
| C24_rep2           | 50,471,752 | 48,508,544  | 4,899,362,944 | 96.07    | 96.11% | 44,286,584             | 91.30% |
| C24_rep3           | 45,103,910 | 44,254,552  | 4,469,709,752 | 87.64    | 98.12% | 39,826,590             | 89.99% |
| ddm1-Col_rep1*     | -          | 54,882,840  | 4,939,455,600 | 96.85    | -      | 48,491,886             | 88.36% |
| ddm1-Col_rep2      | 46,602,710 | 45,112,596  | 4,556,372,196 | 89.34    | 96.80% | 42,922,242             | 95.14% |
| ddm1-Col_rep3      | 44,302,852 | 43,579,340  | 4,401,513,340 | 86.30    | 98.37% | 41,282,793             | 94.73% |
| ddm1-ColxC24_rep1* | -          | 55,123,730  | 4,961,135,700 | 97.28    | -      | 47,551,890             | 86.26% |
| ddm1-ColxC24_rep2  | 49,595,054 | 48,251,126  | 4,873,363,726 | 95.56    | 97.29% | 44,378,447             | 91.97% |
| ddm1-ColxC24_rep3  | 41,458,168 | 40,721,794  | 4,112,901,194 | 80.65    | 98.22% | 37,118,404             | 91.15% |
| ddm1-C24xCol_rep1* | -          | 51,949,000  | 4,675,410,000 | 91.67    | -      | 46,078,553             | 88.70% |
| ddm1-C24xCol_rep2  | 44,034,532 | 42,572,010  | 4,299,773,010 | 84.31    | 96.68% | 38,997,801             | 91.60% |

|                          |            |            |               |       |        |            |        |
|--------------------------|------------|------------|---------------|-------|--------|------------|--------|
| <i>ddm1-C24xCol_rep3</i> | 37,013,554 | 35,564,288 | 3,591,993,088 | 70.43 | 96.08% | 32,416,286 | 91.15% |
| <i>ddm1-C24_rep1*</i>    | -          | 54,239,524 | 4,881,557,160 | 95.72 | -      | 45,410,388 | 83.72% |
| <i>ddm1-C24_rep2</i>     | 45,164,888 | 43,653,310 | 4,408,984,310 | 86.45 | 96.65% | 38,205,986 | 87.52% |
| <i>ddm1-C24_rep3</i>     | 42,170,418 | 40,024,474 | 4,042,471,874 | 79.26 | 94.91% | 34,557,911 | 86.34% |

---

**Supplemental Table S5. BSseq data set, Related to Figure 3 and 5.**

| <b>Samples</b>       | <b>Raw reads</b> | <b>Mapped Reads</b> | <b>Mapped rates</b> | <b>Depth</b> | <b>Conversion Rates *</b> | <b>C</b> | <b>CG</b> | <b>CHG</b> | <b>CHH</b> |
|----------------------|------------------|---------------------|---------------------|--------------|---------------------------|----------|-----------|------------|------------|
| Col                  | 49,025,828       | 45,083,334          | 91.96%              | 34.11        | 99.60%                    | 6.75%    | 26.74%    | 8.56%      | 2.38%      |
| ColXC24              | 51,362,438       | 43,716,788          | 85.11%              | 33.07        | 99.63%                    | 8.91%    | 28.56%    | 10.91%     | 3.52%      |
| C24XCol              | 44,700,556       | 38,811,690          | 86.83%              | 29.36        | 99.66%                    | 9.60%    | 30.75%    | 11.79%     | 3.71%      |
| C24                  | 48,760,236       | 39,186,398          | 80.37%              | 29.65        | 99.61%                    | 7.05%    | 24.37%    | 8.46%      | 2.68%      |
| <i>ddm1</i> -Col     | 46,370,212       | 41,679,868          | 89.89%              | 31.53        | 99.67%                    | 3.44%    | 12.17%    | 3.53%      | 1.69%      |
| <i>ddm1</i> Colx24   | 52,098,186       | 44,923,246          | 86.23%              | 33.99        | 99.65%                    | 3.59%    | 10.28%    | 3.14%      | 1.97%      |
| <i>ddm1</i> -C24xCol | 52,116,108       | 44,850,052          | 86.06%              | 33.93        | 99.64%                    | 3.18%    | 10.12%    | 2.88%      | 1.63%      |
| <i>ddm1</i> -C24     | 46,234,356       | 36,653,222          | 79.28%              | 27.73        | 99.61%                    | 2.55%    | 8.34%     | 2.55%      | 1.22%      |

## Supplementary Text

### DEGs explained differential phenotypes between parents but could not justify heterosis

To understand the molecular mechanisms that underlie heterosis, we performed whole genome transcriptome (RNAseq) and DNA methylome (bisulfite sequencing, BSseq) analysis of 14 d old seedlings of different genotypes. The results were first analyzed using Principal Component Analysis (PCA). Three biological replicates for each genotype clustered together in RNAseq (Supplemental Figure S4A, Table S7), suggesting that the library preparation and sequencing were highly reproducible. We identified differentially expressed genes (DEGs) between Col and C24 parents by RNAseq, and confirmed 48 randomly selected DEGs by qRT-PCR. We observed a very strong correlation between qRT-PCR and RNA-Seq (Supplemental Figure S4C, Pearson correlation coefficient = 0.85,  $p = 5.18e-09$ ), which validated RNAseq results. The PCA plot indicated that the expression patterns in WT-F<sub>1</sub> and *ddm1*-F<sub>1</sub> hybrids were distinct from their respective parents (Supplemental Figure S4A). The PCA plot of BSseq data revealed a similar pattern with that of RNAseq for the WT series. In contrast, the *ddm1*, F<sub>1</sub> hybrids overlapped with the *ddm1*-Col parent, whereas the *ddm1*-C24 parent represented a separate group (Supplemental Figure S4B, Table S8).

To investigate the molecular basis of BPH-to-MPH conversion in *ddm1*-F<sub>1</sub>, we identified differentially expressed genes (DEGs) in different genotypes. A total of 12

groups of pair-wise comparisons were made in F<sub>1</sub> and parents in WT and *ddm1* mutant (Supplemental Figure S5A). The total number of DEGs between F<sub>1</sub> and parents was much greater in the *ddm1* backgrounds (4411) than in the WT backgrounds (1684), consistent with a hypermethylation function for DDM1. *Ddm1* mutants become hypomethylated, which in turn activates gene transcription, leading to higher number of DEGs. Further, a majority of WT DEGs (73.9%, 1246/1684) were shared with *ddm1* DEGs, implying that these additional DEGs are responsible for *ddm1* effect on plant phenotype. In WT, a large number of DEGs (1666) were observed in Col Vs. C24 which explained the growth difference between Col and C24. From WT-F<sub>1</sub> vs. Parent (ColxC24 Vs. Col and ColxC24 Vs. C24) comparisons, we identified a total of 574 DEGs; a large proportion of which was shared with Col/C24 DEGs (561/574). Only a small proportion of these DEGs (8/574) were differential in both Col and C24 (Supplemental Figure S5B). This was not consistent with the observed phenotypes, as F<sub>1</sub> showed biomass heterosis compared to both the parents. The *ddm1*-Col vs. *ddm1*-C24 showed 4115 DEGs which were much higher than that of WT, indicating that *ddm1* mutation could enlarge the variance between parents. This was also supported from the PCA plot (Supplemental Figure S4A) and phenotypic observations (Figure 2B). Similar to WT, even *ddm1* mutant data revealed that a majority F<sub>1</sub>/parents DEGs was shared with Col/C24 DEGs and also only few genes in F<sub>1</sub> are differentially expression as compared to both the parents (Supplemental Figure S5C). Thus, although DEG analysis provided insight into the molecular basis for differential phenotypes between parents; it could not explain the

occurrence of heterosis in WT or why the *ddm1* mutation shifts BPH to MPH.

### **Expression of SA-NEGs is not mainly regulated by DNA methylation**

We classified the 312 SA-NEGs into three groups based on the DNA methylation levels in putative promoter regions (2 kb up-stream regions of transcription start site (TSS)): high-methylation ( $n=43$ ,  $mC > 0.1$ ), low-methylation ( $n=99$ ,  $0.1 > mC > 0.01$ ) and unmethylated ( $n=170$ ,  $mC < 0.01$ ) (Supplemental Figure S7 and Table S6), and subsequently determined transposon abundance in their promoter regions, given that DDM1 typically targets these regions (Supplemental Figure S8A). RNAseq and BSseq data for each group were compared independently, confirming the inverse co-relation between promoter methylation and gene expression. The high-methylation group showed significantly lower spearman co-efficiency -0.47 ( $p < 2.2e-16$ ), indicating that methylation represses gene expression. The promoters from the high-methylation group were enriched in transposons (Supplemental Figure S8A). The low-methylation group exhibited a lower negative association of expression with DNA methylation of promoters ( $\rho = -0.24$ ;  $p = 2.8e-16$ ) than high-methylation group, and no significant correlation between methylation and gene expression was seen for the unmethylated group ( $P > 0.05$ ). For a few representative genes, promoter methylation and gene expression profiles were visualised using the IGV server independently for high- (Supplemental Figure S8B) and low- (Supplemental Figure S8C) methylated group. The SA-NEGs related to the SA pathway were enriched in the low-methylation and unmethylated category (Figure

3D-F, S4D).



## Supplementary Figures Legends

### Supplemental Figure S1. Genotyping and Phenotyping of RdDM mutants

(A) Genotyping of *rdr2*. The polymorphic sequence was amplified and digested with appropriate restriction enzyme (Supplement file 1, 5, 6 and 8). The products were run on 4% agarose gel. (B) Genotyping of *dms3*. Amplification was carried out with specific primers located or outside T-DNA inserts, and amplicons were run on 1.5% agarose gel. Genotyping of *drd1* (C), *rdm1* (D) *nrpe1* (F) and *ago4* (G) was performed as described for *rdr2*. Genotyping of *nrpd1* (E), *ago6* (H) and *rdm3* (I) was performed as per *dms3*. The LP, RP denote left, right genomic primers; BP stands for T-DNA border primer. Variation means a single nucleotide polymorphism (SNP) or an indel between Col and C24, which was used to examine whether hybridization between Col and C24 were successful. (J) The phenotyping of F<sub>1</sub> and reciprocal F<sub>1</sub> produced under different RdDM mutant background was performed and data was quantified in the terms of leaf width (n > 6).

### Supplemental Figure S2. Genotyping of *ddm1* mutant alleles

Panel A-G represents genotyping of different *ddm1* alleles. Sequence polymorphisms and T-DNA inserts were used to identify *ddm1* alleles in Col, C24 and their F<sub>1</sub> hybrids (Supplement files 7 and 8). In (A, B), more than two variations were applied to identify F<sub>1</sub> hybrids, and the chromosome on which a variation is located is shown on the right. The panel H represent the chop-PCR result of 5s rDNA for different *ddm1* alleles. The 5S rDNA region was amplified from DNA templates digested by HpaII, and products were run on a 2% agarose gel. The de-methylation of 5S rDNA is considered as an important indicator of functional *ddm1* alleles. The loss of 5S rDNA methylation in all the three newly generated *ddm1* allele (*ddm1-14*, *ddm1-15* and *ddm1-16*) confirms their functional nature.

### Supplemental Figure S3. The early seedling growth heterosis was impaired in F<sub>1</sub> hybrids resulted from crosses between different *ddm1* mutated alleles in Col and C24 backgrounds

(A) The different *ddm1* mutated alleles in Col (green) and C24 (red) backgrounds. (B) F1 hybrids showed reduced heterosis in 18-22 DAS in *ddm1* background. (C) The heterosis was maintained in 18-22 DAS when different *ddm1* mutated alleles were crossed with WT alleles. (D) Phenotypic representation of impaired heterosis in *ddm1* background at 18-22 DAS. (Scale bar = 1 cm) (E) Heterosis was presented in F1 hybrids from crosses between *ddm1* mutant and WT. F1, F1 offspring from ColXC24 crosses; rF1, F1 offspring from reciprocal C24XCol crosses. (F) Similar growth pattern displayed between F1 offspring from cross between two WT parents and heterozygous F1 hybrids from cross between *ddm1* and WT parents.

**Supplemental Figure S4. Principal component analysis (PCA) of transcriptome and DNA methylation data, real-time PCR based validation of RNAseq data and SA related genes**

The PCA analysis was performed on the RNAseq (A) and BSseq (B) data. Different genotypes under WT and *ddm1* are represented as solid dots and circles, respectively. The expression of 48 randomly selected DEGs was performed through real-time qPCR and data was correlated with that of RNAseq (C). The SA-NEGs related to SA metabolism were classified on the basis of their involvement with SA responsive genes (D). The letter 'O' and 'D' in brackets before gene IDs indicated that the genes were from 'overlap' or '*ddm1* specific' groups in C respectively. The letter 'H', 'L' and 'U' in brackets after gene names indicated that the gene were from 'High-methylation', 'Low-methylation' or 'Unmethylated' groups in Figure 6.

**Supplemental Figure S5: Pair wise analysis of differentially expressed genes (DEGs) in different genotypes of WT and *ddm1* mutant background.**

(A) Barplots showing the number of DEGs related to four genotypes of parents and F1 hbyrids in WT and *ddm1*. (B) Venn charts showing the overlapping DEGs F1/parents and Col/C24 in WT. (C) Venn charts the overlapping DEGs of F1/parents and Col/C24 in *ddm1*.

**Supplemental Figure S6. Hormetic effects of exogenous SA on seedling growth.**

Arabidopsis seedlings from Col and C24 were grown on 1/2 MS medium with different concentrations of salicylic acid, as indicated (mol/L). At 12 d after growth seedlings were transplanted to soil. At 6 d (Col) or 8 day (C24) after growth, their growth pattern was documented and quantified in terms of fresh weight and plant size (n = 40-45 seedlings, scale bar = 1 cm).

**Supplemental Figure S7. Analysis on the relationship between DNA methylation of promoters and expressions of SA-NEGs.** The SA-NEGs were classified into three groups on the basis of methylation levels in putative promoter elements (up-stream -2kb from transcript start site (TSS)) in the Col parent: high-methylation,  $mC > 0.1$ ; low-methylation,  $0.1 > mC > 0.01$ ; unmethylated,  $mC > 0.01$ . The normalized gene expression levels for each group is also shown (A)

**Supplemental Figure S8. Transposons enrichment profiles and examples of different sub-groups of SA-NEGs. Related to Figure 6.**

(A) Transposons enrichment profiles of SA-NEGs. **NEGs**, sum of the corresponding SA-NEGs; **Random**, the same number of genes randomly selected in the genome, 1000 times calculation. (B and C) Promoter DNA methylation and gene expression profiling of representative High (B) and un-methylated (C) NEGs in different genotypes in WT and *ddm1* background.

**A**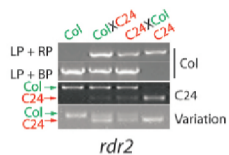**D**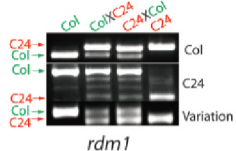**G**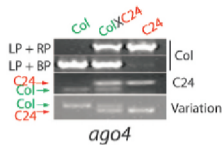**J**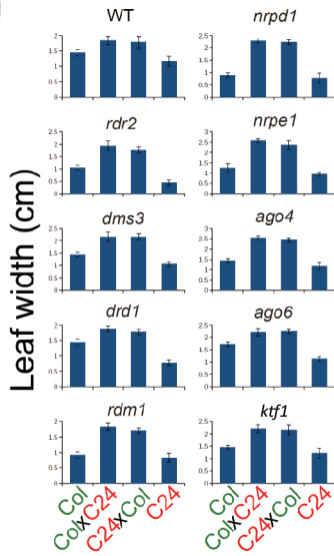**B**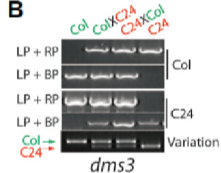**E**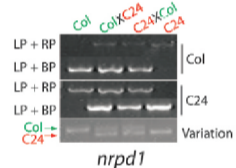**H**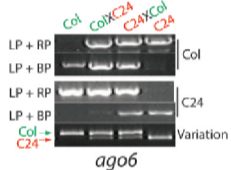**C**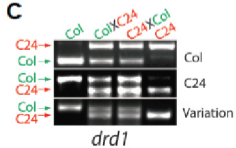**F**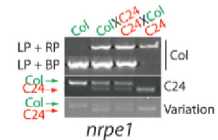**I**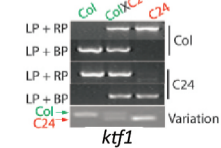

**A**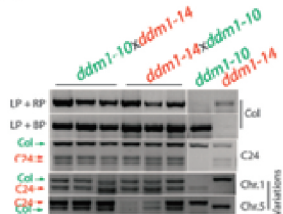**B**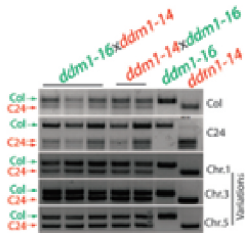**F**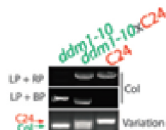**C**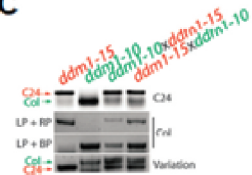**D**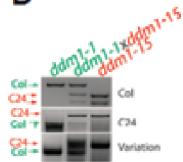**E**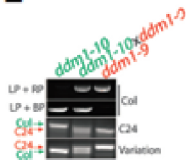**G**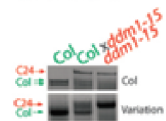**H**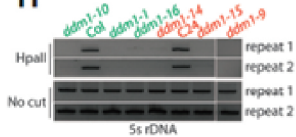

**A**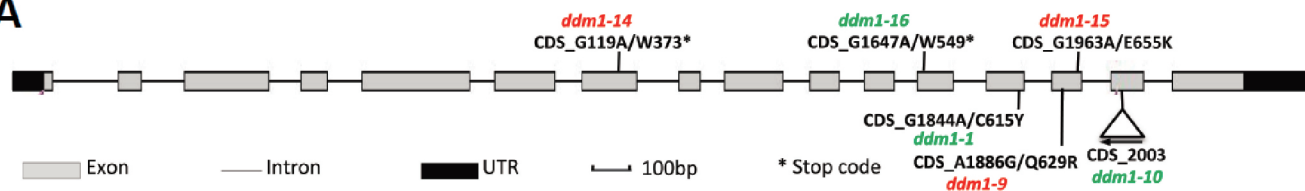**B**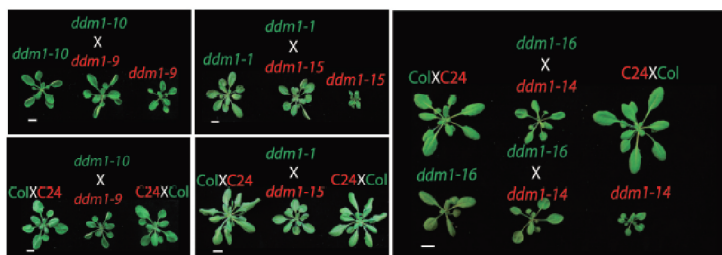**C**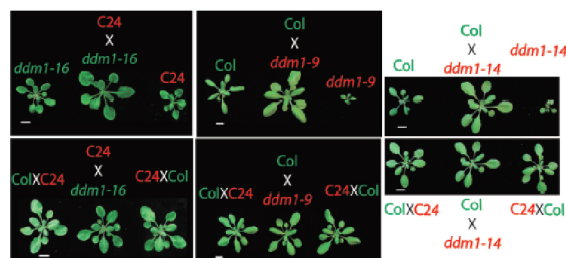**D**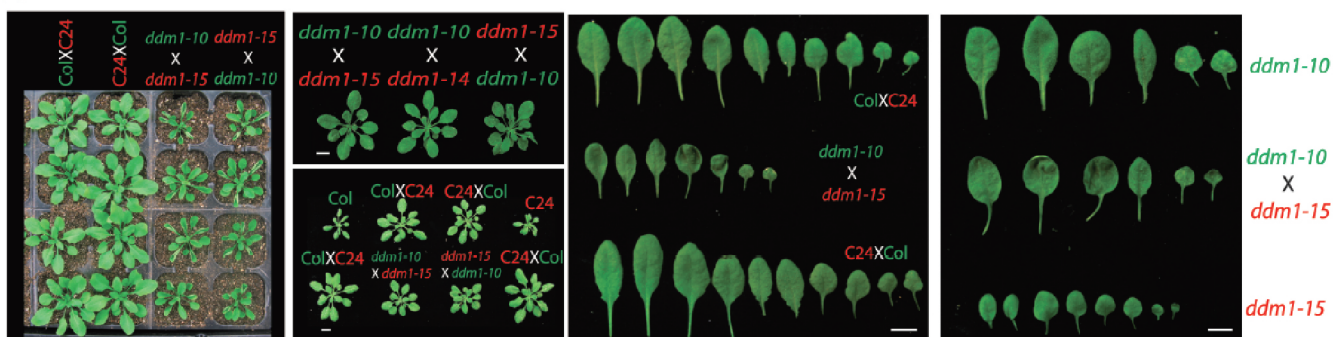**E**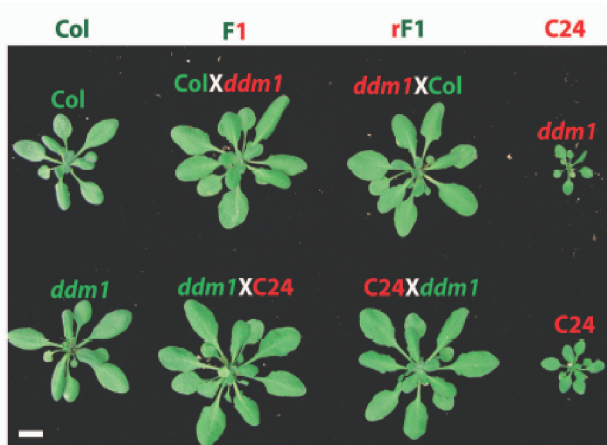**F**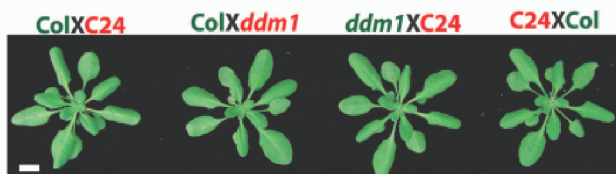

A

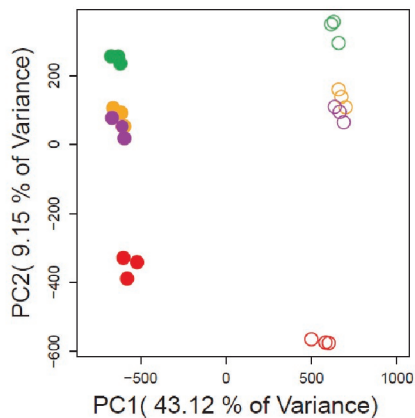

B

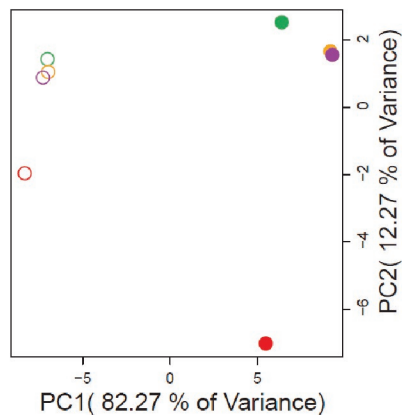

C

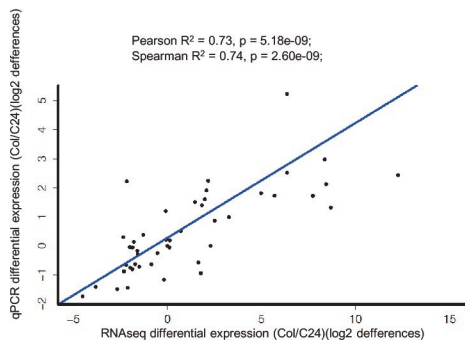

D

Other genes responded to SA

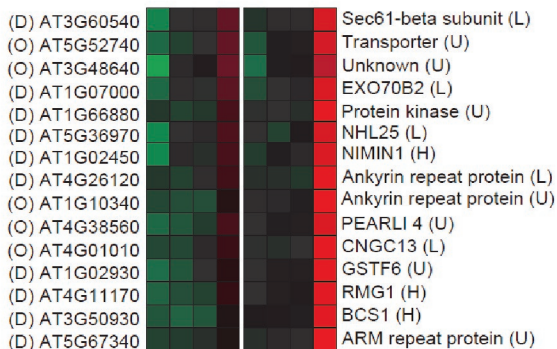

**A**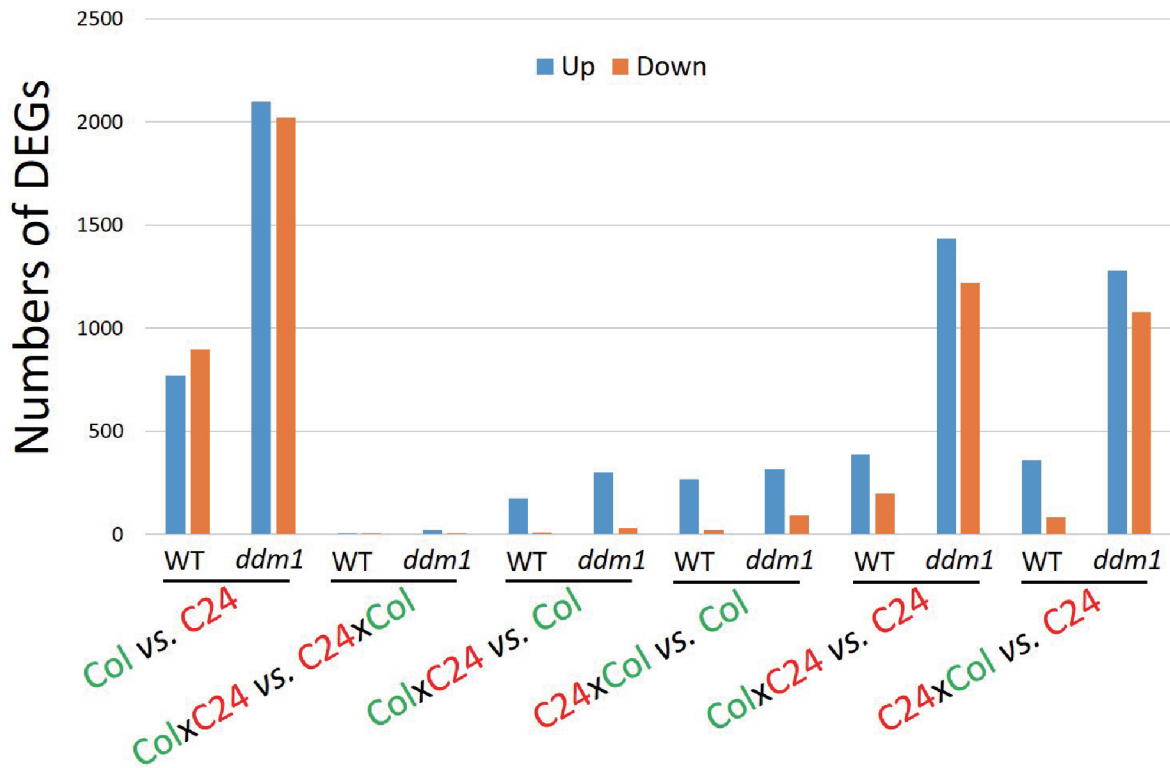**B**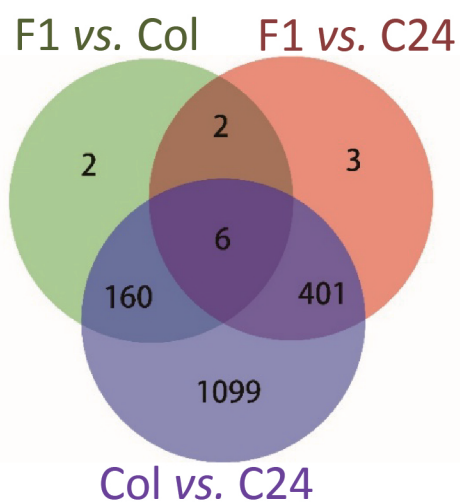**C**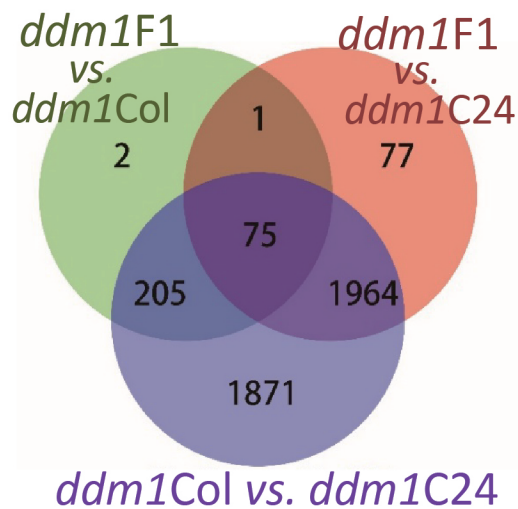



**A****Col**, SA concentration in medium plates (mol/L)

Mock 1e-9 1e-8 1e-7 1e-6 1e-5 1e-4

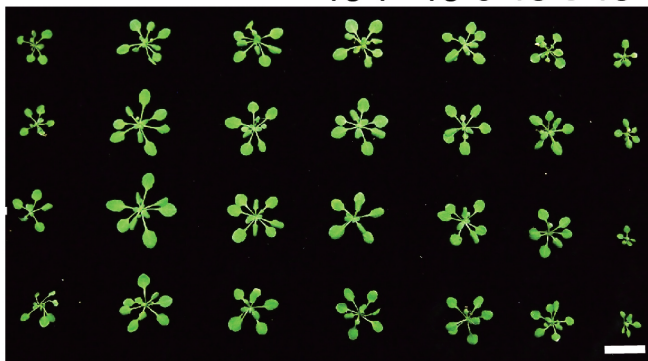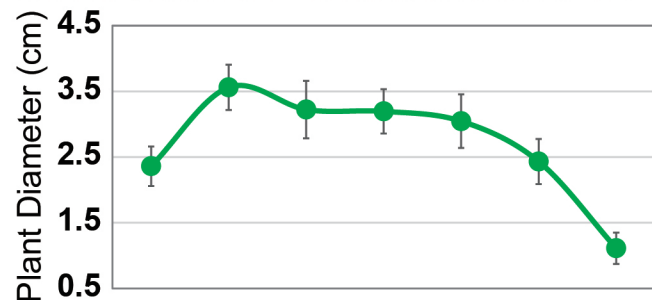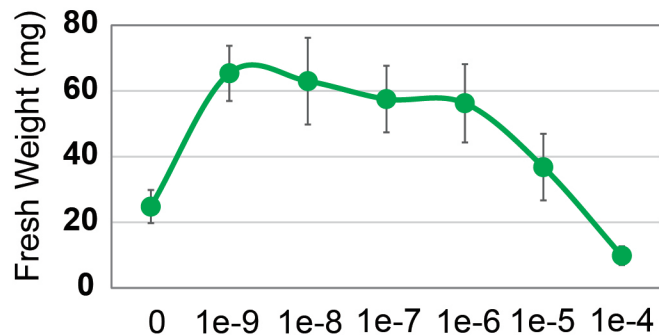

SA concentration in medium plates (mol/L)

**B****C24**, SA concentration in medium plates (mol/L)

Mock 1e-9 1e-8 1e-7 1e-6 1e-5 1e-4

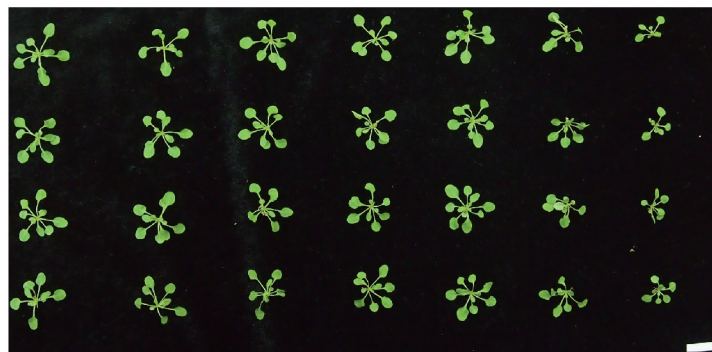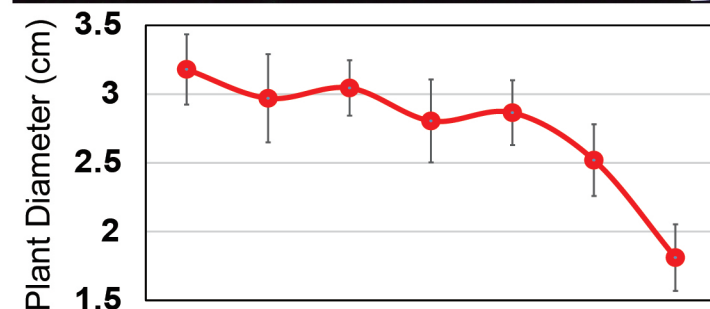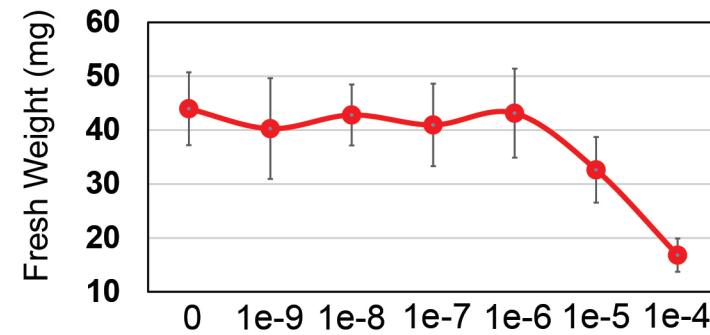

SA concentration in medium plates (mol/L)

# DNA methylation of promoters

## High-methylation Low-methylation

## Unmethylated

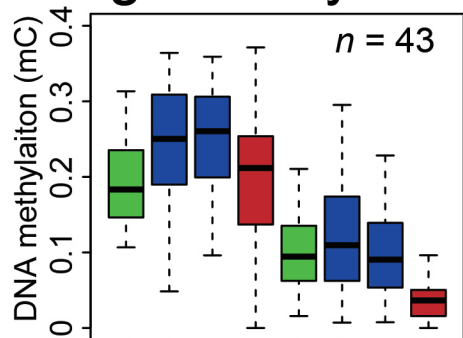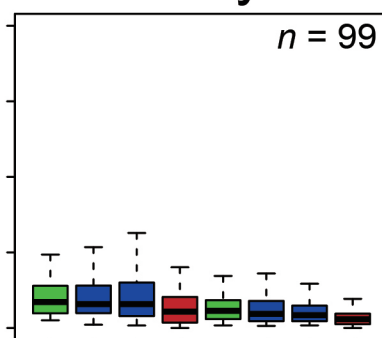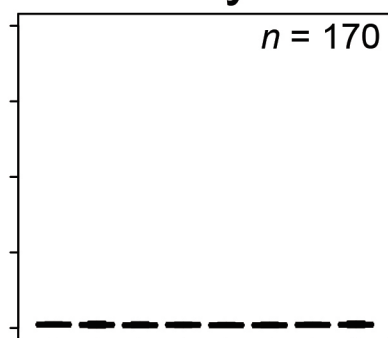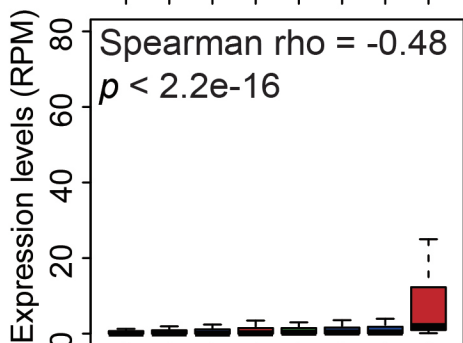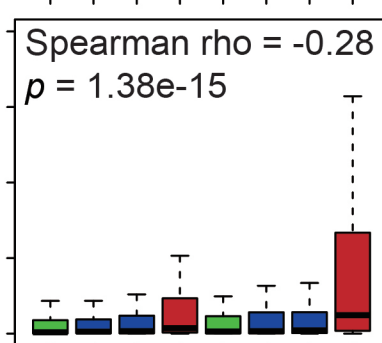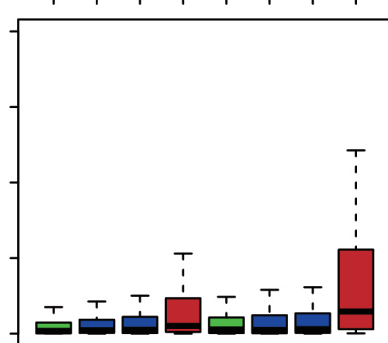

WT *ddm1*

WT *ddm1*

WT *ddm1*
